# Supplementary material for: Hydrogenated nanotubes/nanowires assembled from TiO2 nanoflakes with exposed {111} facets: excellent photo-catalytic CO2 reduction activity and charge separation mechanism between (111) and (111) polar surfaces
Source: Royal Society of Chemistry journal article supplement (doi:10.1039/c9ta00736a), 2019-01-01
Supplement: c9ta00736a1.pdf [file c9ta00736a1.pdf]

Electronic Supplementary Material (ESI) for Journal of Materials Chemistry A.  
This journal is © The Royal Society of Chemistry 2019

Supporting Information of the manuscript entitled

**Hydrogenated nanotubes/nanowires assembled from TiO<sub>2</sub> nanoflakes exposing {111} facets: excellent photocatalytic CO<sub>2</sub> reduction activity and charge separation mechanism between polar (111) and ( $\bar{1}\bar{1}\bar{1}$ ) surfaces**

Junfang Liu,<sup>a</sup> Bin Liu,<sup>a</sup> Yan Ren,<sup>a</sup> Yukun Yuan,<sup>a</sup> Hua Zhao,<sup>a</sup> Heqing Yang,<sup>a\*</sup> and Shengzhong (Frank) Liu<sup>b</sup>

<sup>a</sup> Shaanxi Key Laboratory for Advanced Energy Devices; Shaanxi Engineering Laboratory for Advanced Energy Technology; Key Laboratory of Macromolecular Science of Shaanxi Province, School of Materials Science and Engineering, Shaanxi Normal University, Xi'an, 710119, China.

<sup>b</sup> Key Laboratory of Applied Surface and Colloid Chemistry, National Ministry of Education; Shaanxi Key Laboratory for Advanced Energy Devices; Shaanxi Engineering Lab for Advanced Energy Technology, School of Materials Science and Engineering, Shaanxi Normal University, Xi'an 710119, China.

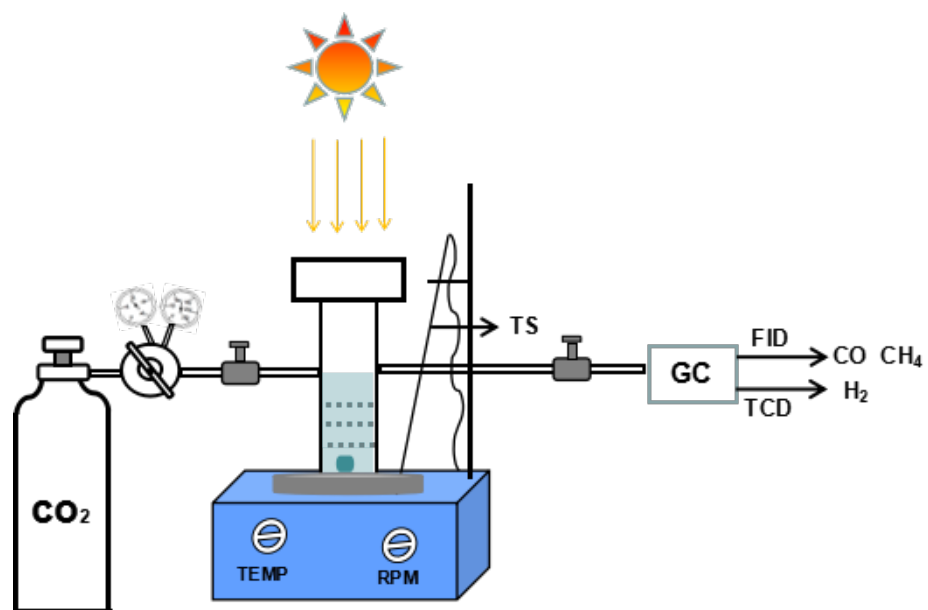

TS: Temperature sensor    TEMP: Temperature    RPM: Revolutions Per Minute

GC: Gas chromatography    FID: Flame Ionization Detector

TCD: Thermal Conductivity Detector

**Figure S1** The reactor and detector used for photocatalytic reduction of CO<sub>2</sub> with H<sub>2</sub>O

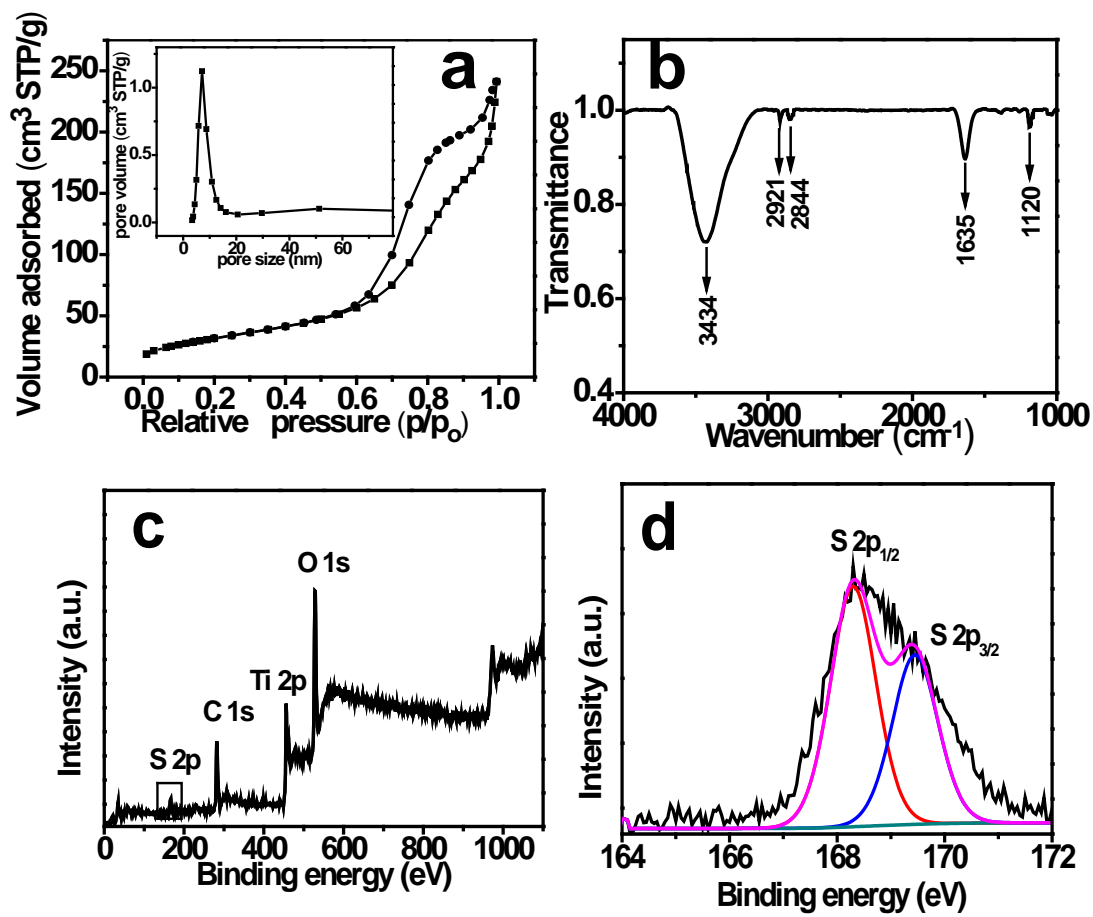

**Figure S2** (a) N<sub>2</sub> adsorption-desorption isotherm and (inset) corresponding Barrett–Joyner–Halenda (BJH) pore size distribution, (b) IR spectrum, (c) Survey XPS and (d) S 2p XPS spectra of the as-synthesized TiO<sub>2</sub> nanotubes/nanowires.

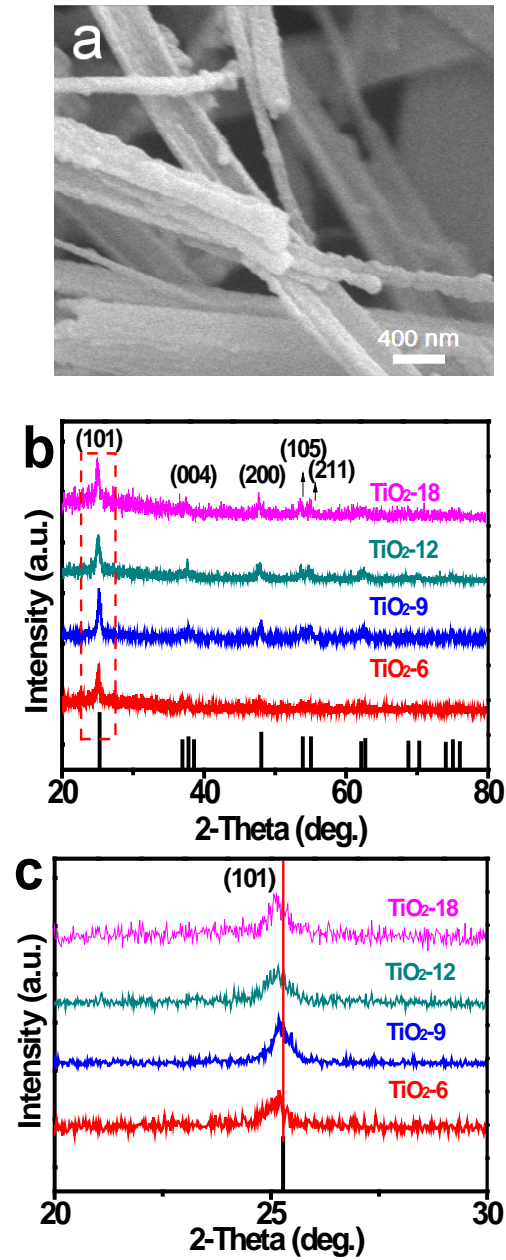

**Figure S3** (a) SEM image of TiO<sub>2</sub>-18 hydrogenated TiO<sub>2</sub> samples, (b) XRD patterns of the TiO<sub>2</sub>-6, TiO<sub>2</sub>-9, TiO<sub>2</sub>-12 and TiO<sub>2</sub>-18 hydrogenated TiO<sub>2</sub> samples and (c) enlargement of (101) peaks in (b).

## The apparent quantum yield measurement

According to the literature <sup>1</sup>, the apparent quantum yields for H<sub>2</sub>, CO and CH<sub>4</sub> were measured with monochromatic light obtained by using band pass filter of 365 nm with the intensity of 40 mW cm<sup>-2</sup>. The irradiation area was controlled as 12.56 cm<sup>2</sup>, and the apparent quantum yield was calculated as below:

$$\eta_{AQY} = \frac{Ne}{Np} \times 100\% = \frac{n \times M \times N_A}{\frac{E_{total}}{E_{photo}}} \times 100\% = \frac{n \times M \times N_A}{\frac{S \times P \times t}{h \times \frac{c}{\lambda}}}$$
$$= \frac{n \times M \times N_A \times h \times c}{S \times P \times t \times \lambda} \times 100\%$$

Where n is 2, 2 and 8, for H<sub>2</sub>, CO and CH<sub>4</sub>, respectively. M is the amount of production (mol), N<sub>A</sub> is Avogadro constant (6.022×10<sup>23</sup> /mol), h is the Planck constant (6.626×10<sup>-34</sup> J·s), c is the speed of light (3×10<sup>8</sup> m/s), S is the irradiation area (cm<sup>2</sup>), P is the intensity of irradiation light (W/cm<sup>2</sup>), t is the photoreaction time (s), λ is the wavelength of the monochromatic light (m).

## Preparation of TiO<sub>2</sub> photocatalyst film on indium-tin oxide (ITO) conductor glass

TiO<sub>2</sub> photocatalyst film was prepared on ITO) conductor glass. Typically, an ITO conductor glass with the size of 2.0 cm × 2.0 cm was cleaned ultrasonically with ethanol,

acetone and isopropanol for 10 min., respectively, and then dried by nitrogen to obtain a clean ITO glass. The cleaned ITO glass is irradiated by a 30 W UV lamp for 6 min. 0.020 g of photocatalyst was added into 4 mL ethanol. The mixture was treated under ultrasonic irradiation for 3.0 h, forming a turbid liquid. 150  $\mu$ L of turbid liquid was added into the ITO glass substrate, which were rotated at 500 revolutions per minute (rpm) for 10 s, and subsequently rotated at 2000 rpm for 30 s. The film was heated at 50  $^{\circ}$ C for 10 min in air. The procedure was repeated eight times to obtain TiO<sub>2</sub> photocatalyst film.

#### **The current-voltage (I-V) property measurement.**

I-V property of the as-prepared TiO<sub>2</sub> photocatalyst film was measured in dark. Schematic diagram of the current sensing measurement is shown in Figure. S4. The electrical property was recorded by a Keithley 2601 source measurement unit at room temperature.

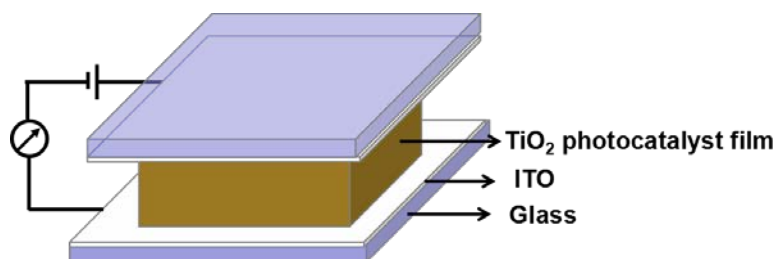

**Figure S4.** Schematic diagram of the current-voltage measurement.

## The Photocurrent measurement

The photocurrent measurement of the as-prepared TiO<sub>2</sub> photocatalyst film was performed on a CHI 660E electrochemical station (Shanghai Chenhua) with a three-electrode system, in which Pt foil and saturated Ag/AgCl ( $E_0 = 0.2046$  V) were used as the counter electrode and reference electrode, respectively. The electrolyte was 0.5 M Na<sub>2</sub>SO<sub>4</sub> solution (PH = 7). A 3 W light emitting diode (LED) lamp ( $\lambda = 365$  nm) was used as the UV irradiation source. Distance between the LED lamp and work electrode is 10.0 cm. The schematic illustration for set up of photocurrent measurement is shown in Figure. S5.

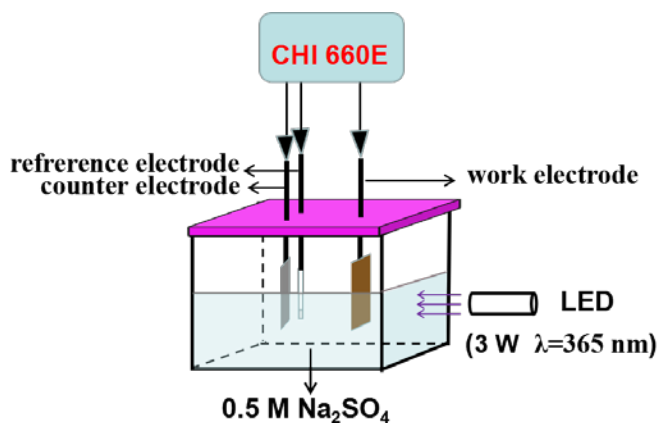

**Figure S5.** Schematic illustration for set up of photocurrent measurement

## Reference

[1] Z. J. Wang, X. Y. Yang, T. J. Yang, Y. B. Zhao, F. Wang, Y. Chen, J. H. Zeng, C. Yan, F. Huang,

J. X. Jiang, *ACS Catal.*, 2018, **8**, 8590–8596.
